# Supplementary material
Source: Springer Nature journal article supplement (https://www.springermedizin.de/resource/supplementary/12876_2010_590_MOESM1_ESM.pdf/9437318)

| Region     | City/Province | Site                                                             | Figure reference number |
|------------|---------------|------------------------------------------------------------------|-------------------------|
| South      | Guangzhou     | Sun Yat-Sen University Cancer Center                             | 1                       |
|            | Nanning       | Tumor Hospital of Guangxi Zhuang Autonomous Region               | 2                       |
| West       | Chengdu       | Sichuan West China Hospital                                      | 3                       |
| Central    | Changsha      | Xiangya Hospital                                                 | 4                       |
| North-West | Xi'an         | Xijing Hospital                                                  | 5                       |
| North      | Beijing       | People's Liberation Army Hospital                                | 6                       |
|            |               | Cancer Institute & Hospital, Chinese Academy of Medical Sciences | 7                       |
|            |               | Beijing Municipal Oncology Hospital                              | 8                       |
| North-East | Shenyang      | Sheng Jing Hospital of The China Medical University              | 9                       |
| East       | Jiangsu       | Jiangsu Cancer Hospital                                          | 10                      |
|            |               | Bayi Hospital                                                    | 11                      |
|            | Shanghai      | Fudan University Cancer Hospital                                 | 12                      |
|            |               | Changhai Hospital                                                | 13                      |
|            |               | Eastern Hepatobiliary Hospital                                   | 14                      |
|            | Zhejiang      | Zhejiang University Hospital                                     | 15                      |

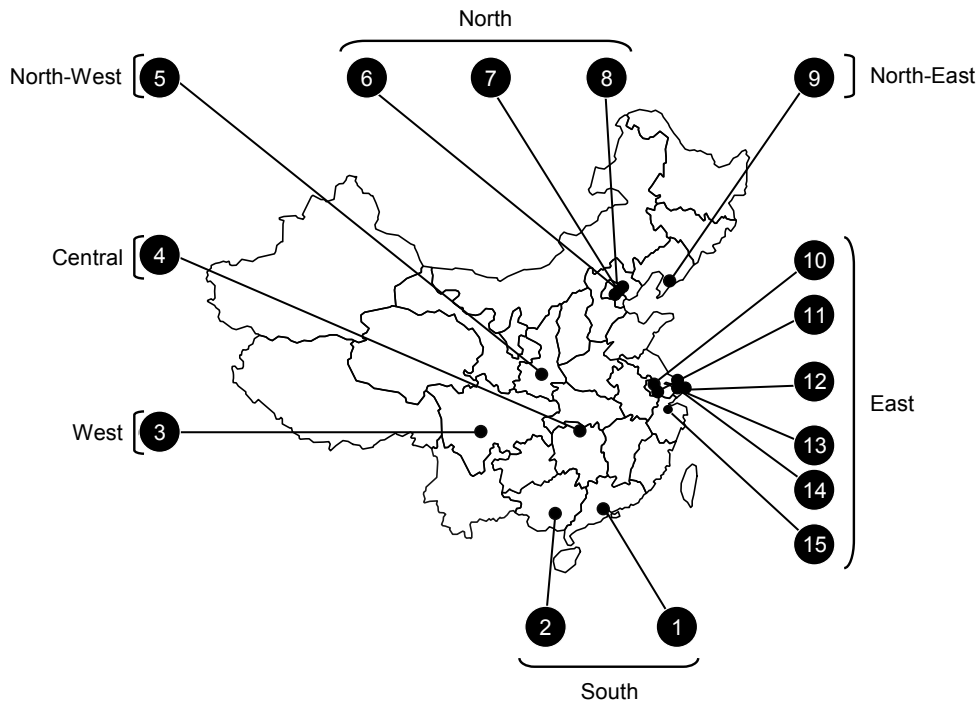

Supplement: MOESM1 [file 9437318]
